# Supplementary material for: Extraction behavior of lanthanides using a diglycolamide derivative TODGA in ionic liquids
Source: Royal Society of Chemistry journal article supplement (doi:10.1039/b810277p), 2008-01-01
Supplement: b810277p.pdf [file b810277p.pdf]

## Extraction behavior of lanthanides using a diglycolamide derivative TODGA in ionic liquids

Kojiro Shimojo,\* Kensuke Kurahashi and Hirochika Naganawa

*Division of Environment and Radiation Sciences, Nuclear Science and Engineering Directorate, Japan Atomic Energy Agency, Tokai-mura, Ibaraki, 319-1195, Japan*

\*To whom correspondence should be addressed. E-mail: shimojo.kojiro@jaea.go.jp

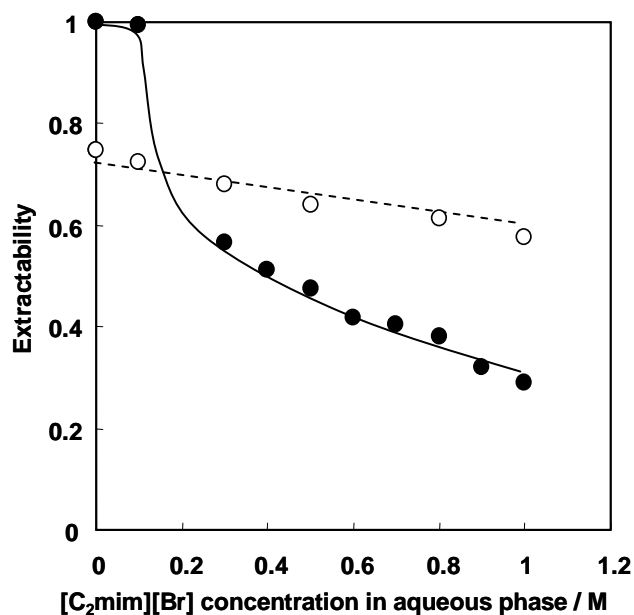

**Fig. S1** Effect of aqueous-phase C<sub>2</sub>mim<sup>+</sup> concentration on extractability of La<sup>3+</sup> using TODGA in [C<sub>2</sub>mim][Tf<sub>2</sub>N] (closed circles and solid line) or in isooctane (open circles and broken line). [La<sup>3+</sup>] = 0.1 mM, [HNO<sub>3</sub>] = 0.01 M, and [TODGA] = 1 mM when using [C<sub>2</sub>mim][Tf<sub>2</sub>N] or [HNO<sub>3</sub>] = 1 M and [TODGA] = 100 mM when using isooctane.

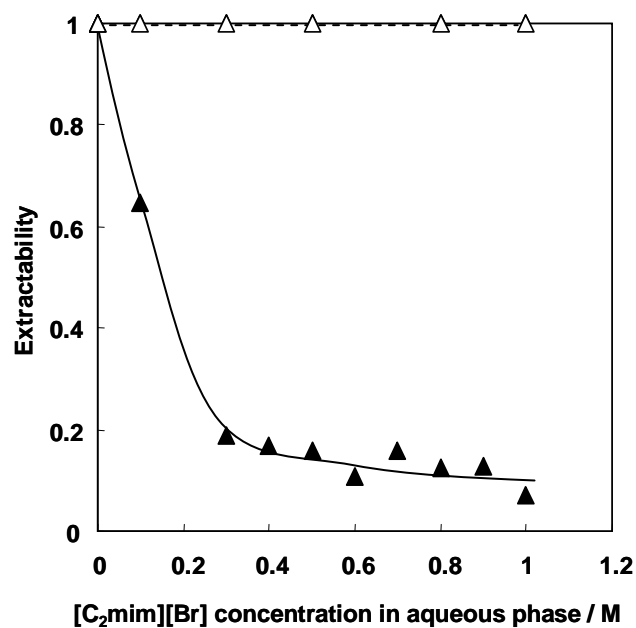

**Fig. S2** Effect of aqueous-phase  $C_2mim^+$  concentration on extractability of  $Lu^{3+}$  using TODGA in  $[C_2mim][Tf_2N]$  (closed triangles and solid line) or in isooctane (open triangles and broken line).  $[Lu^{3+}] = 0.1$  mM,  $[HNO_3] = 0.01$  M, and  $[TODGA] = 1$  mM when using  $[C_2mim][Tf_2N]$  or  $[HNO_3] = 1$  M and  $[TODGA] = 100$  mM when using isooctane.

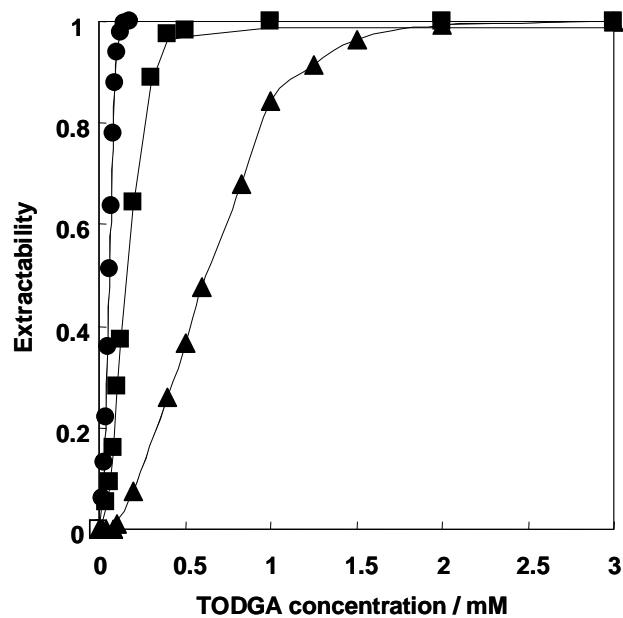

**Fig. S3** Extraction behavior of  $La^{3+}$  using TODGA into  $[C_nmim][Tf_2N]$  ( $n = 2$  (closed circles),  $n = 4$  (closed squares),  $n = 6$  (closed triangles)).  $[La^{3+}] = 0.01$  mM,  $[HNO_3] = 0.01$  M.

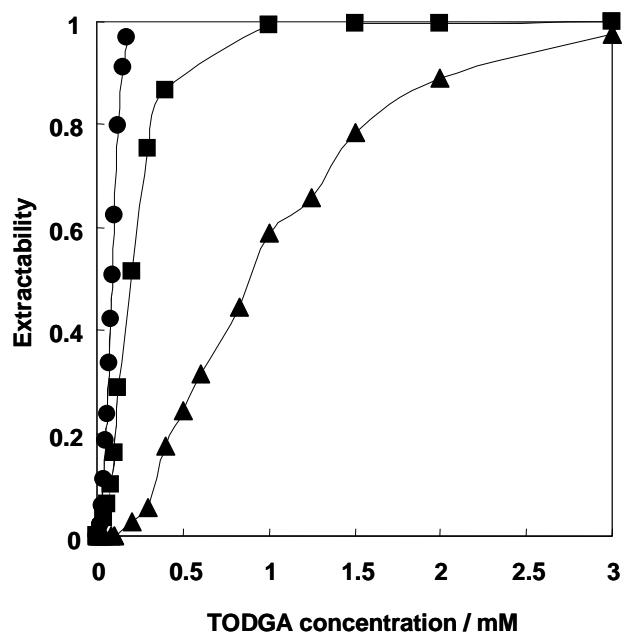

**Fig. S4** Extraction behavior of  $\text{Lu}^{3+}$  using TODGA into  $[\text{C}_n\text{mim}][\text{Tf}_2\text{N}]$  ( $n = 2$  (closed circles),  $n = 4$  (closed squares),  $n = 6$  (closed triangles)).  $[\text{Lu}^{3+}] = 0.01 \text{ mM}$ ,  $[\text{HNO}_3] = 0.01 \text{ M}$ .
